# Supplementary material
Source: PubMed Central journal article supplement (PMC2652304)
Supplement: M807675200_1.pdf [file M807675200_1.pdf]

## SUPPLEMENTAL DATA

### Legends to Supplemental Movies and Figures

Supplemental Movies. Representative streaming movies (200 msec exposures) of CLIP-170 fragments, acquired as described by Folker *et al.* (1).

Supplemental Movie 1. GFP-CLIP-170 H1<sup>1-350</sup>—As previously reported, the complete CLIP-170 H1<sup>1-350</sup> head domain highlights the growing plus-ends of microtubules (MTs) with bright, robust comets.

Supplemental Movie 2. GFP-CLIP-170 H1<sup>58-300</sup>—Removing the first and third serine-rich regions does not abolish the plus-end tracking activity, although the comets are slightly less bright and robust when compared to H1<sup>1-350</sup>.

Supplemental Movie 3. GFP-CLIP-170 H1<sup>203-350</sup>—While not nearly as bright or robust as H1<sup>1-350</sup>, the distal portion of CLIP-170 consisting of CAP-Gly-2 domain and third serine-rich region of H1<sup>203-350</sup> clearly has MT plus-end tracking ability.

Supplemental Figure 1. Fluorescence microscopy visualization of the dynamic polymer morphology formed in the presence of stabilized MT seeds, tubulin (5.0  $\mu$ M) and CLIP-170 fragments. Samples were prepared as described in Fig. 3D-F with some modifications. Briefly, bovine brain tubulin dimly labeled with TAMRA (Invitrogen) was incubated with brightly labeled seeds and either unlabeled H1<sup>1-350</sup> (120 nM) or unlabeled other fragments (240 nM) for 15-20 min at 37 °C and then samples were visualized (200 msec exposures) by fluorescence microscopy. (A) The control sample in the absence of CLIP-170 fragments; (B) H1<sup>1-350</sup>; (C) H1<sup>1-155</sup>; (D) H1<sup>156-350</sup>. Images shown are representative.

Supplemental Figure 2. Fluorescence microscopic analysis of the glutaraldehyde fixed MT polymers formed in the absence of exogenous MT seeds. (A) Tubulin alone (12  $\mu$ M); (B) H1<sup>1-350</sup>; (C) H1<sup>58-211</sup>; (D) H1<sup>58-300</sup>; (E) H1<sup>122-300</sup>; (F) H1<sup>203-350</sup>. Images shown are representative.

Methods used for Supplemental Figure 1. Tubulin was prepared by the high-molarity buffer approach of Castoldi and Popov (2). Images were captured with a 100x 1.3NA objective on a Zeiss Axioplan 2 microscope and a Photometrics CoolSNAP camera. Images were optimized for visualization of the MTs by Adobe Photoshop.

Methods used for Supplemental Figure 2. Samples were prepared, fixed, and diluted as described in Fig. 3A-C, the only modification being that 10% of the tubulin was labeled with TAMRA. They were then mounted for microscopy by compressing 2  $\mu$ L of the diluted sample between a slide and a 22mm coverslip so that the entire sample was visible in one plane. Images were captured (150 msec exposures) on a TE2000 Nikon inverted microscope with a Cascade 512 B camera and processed for visualization by Adobe Photoshop.

## REFERENCES

1. Folker, E. S., Baker, B. M., and Goodson, H. V. (2005) *Mol. Biol. Cell* **16**, 5373-5384
2. Castoldi, M., and Popov, A. V. (2003) *Protein Expr. Purif.* **32**, 83-88.

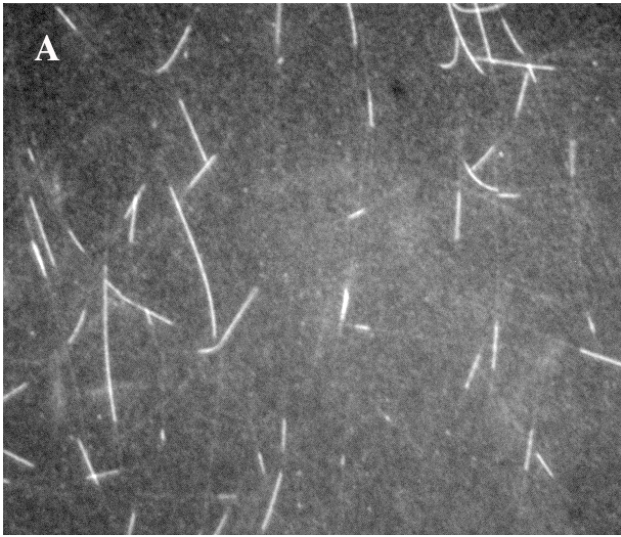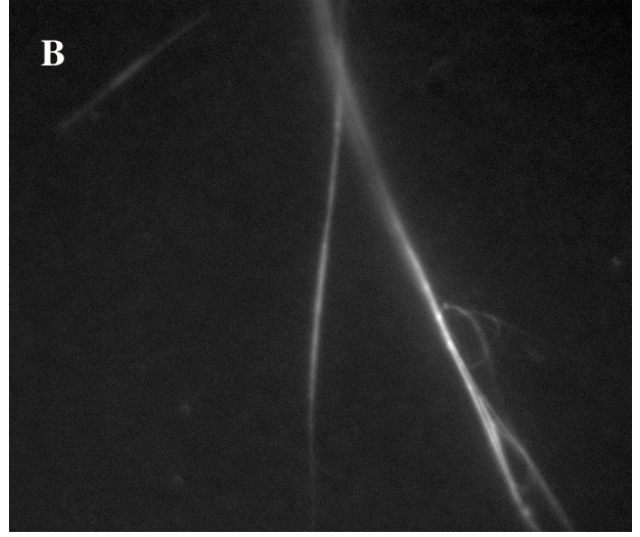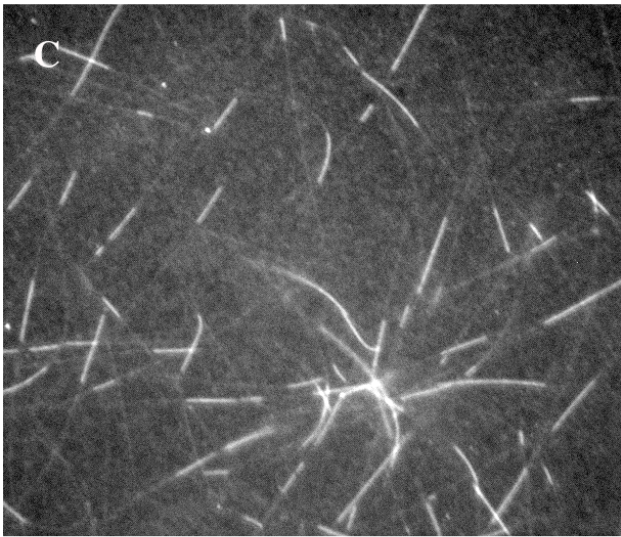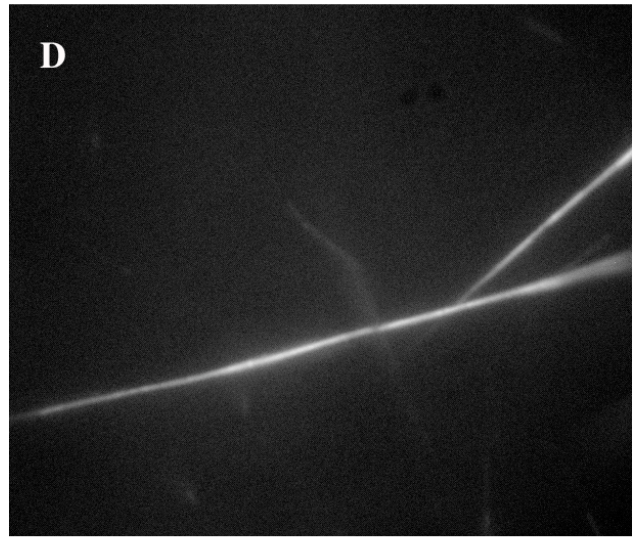

**Supplemental Figure 1.**

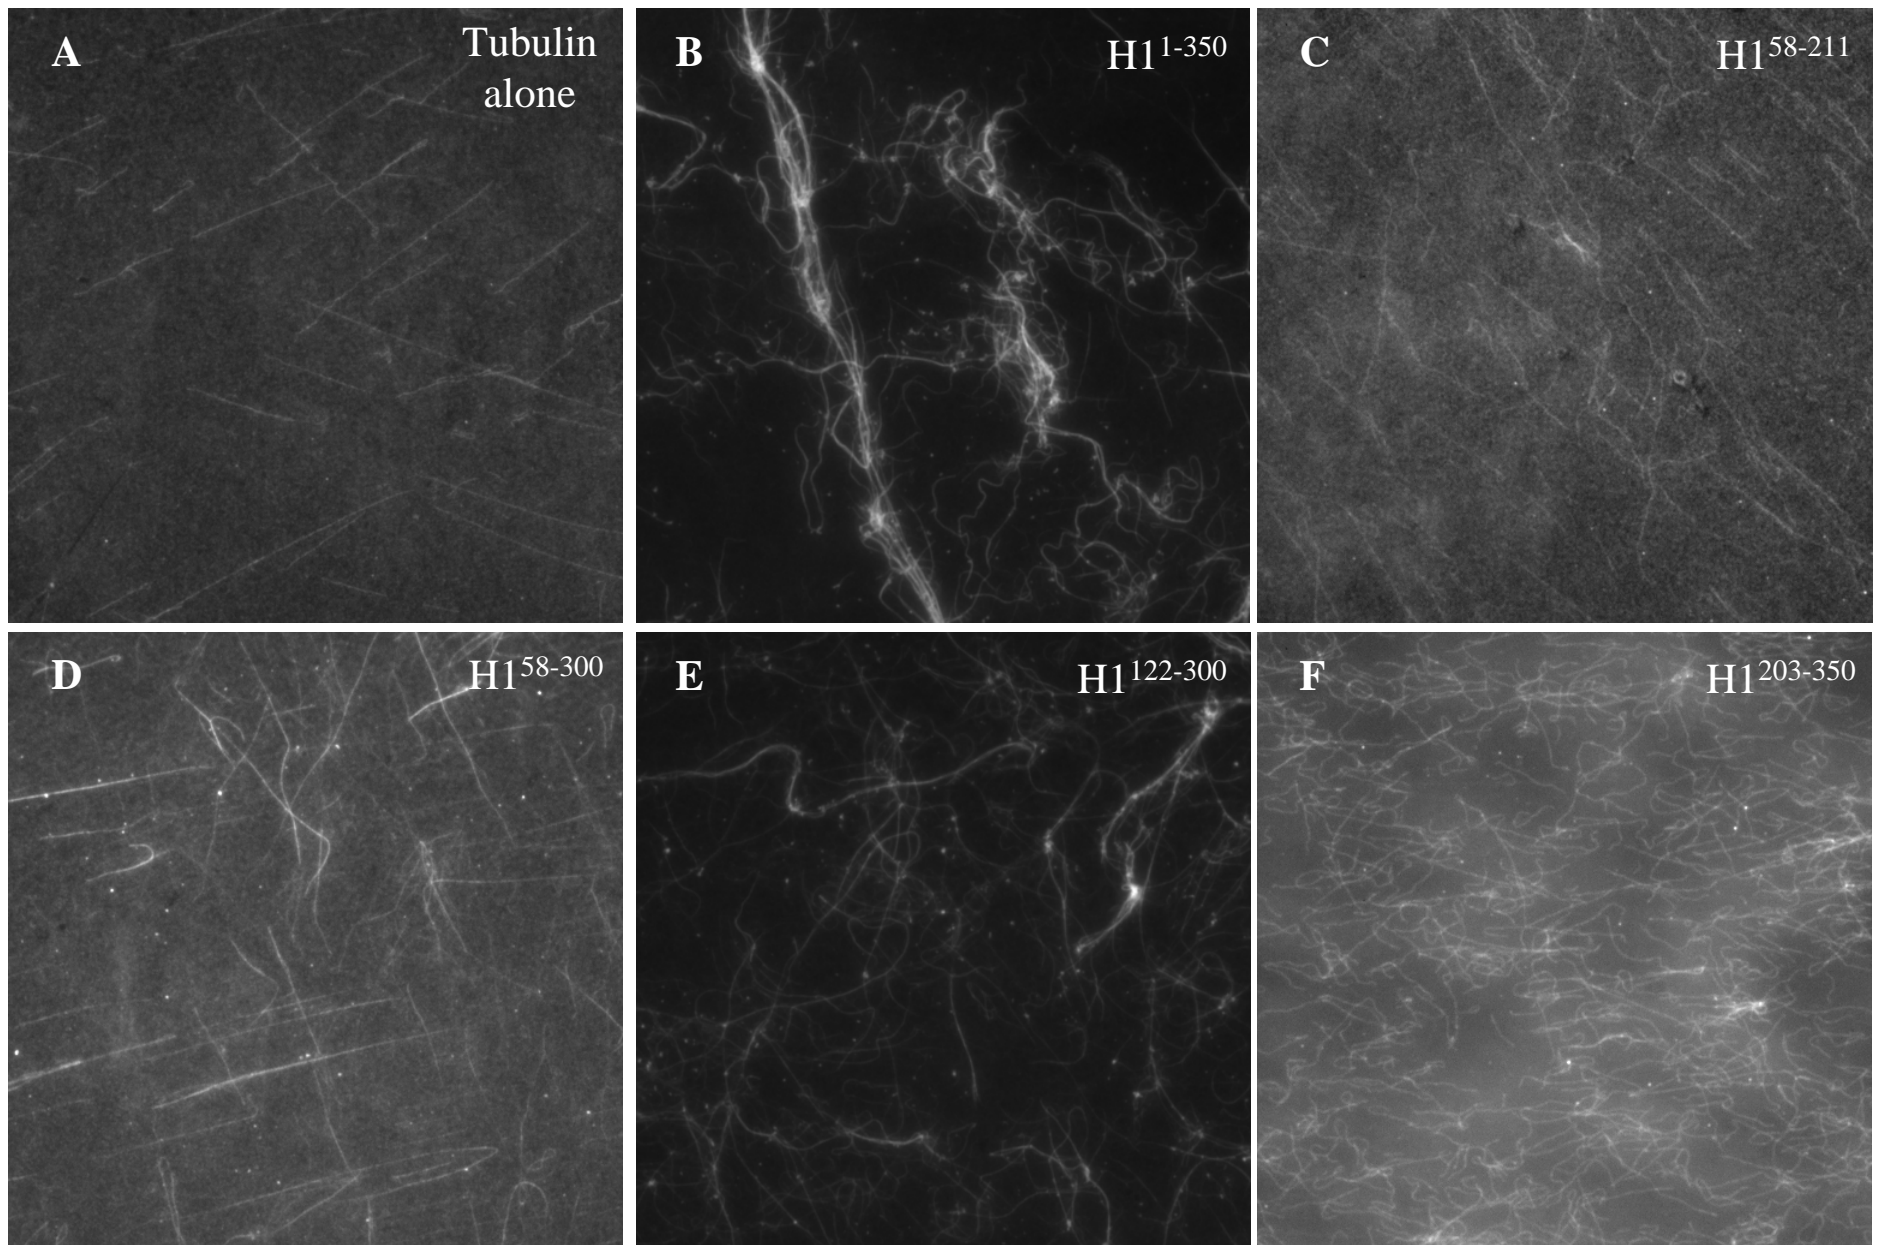

**Supplemental Figure 2.**
